# Supplementary material for: Effect of naringenin and its combination with cisplatin in cell death, proliferation and invasion of cervical cancer spheroids
Source: PubMed Central journal article supplement — RSC Adv. 2020 Dec 22;11(1):129–41. doi: 10.1039/d0ra07309a (PMC8690252; doi:10.1039/d0ra07309a), 2020-12-22
Supplement: RA-011-D0RA07309A-s001.pdf [file RA-011-D0RA07309A-s001.pdf]

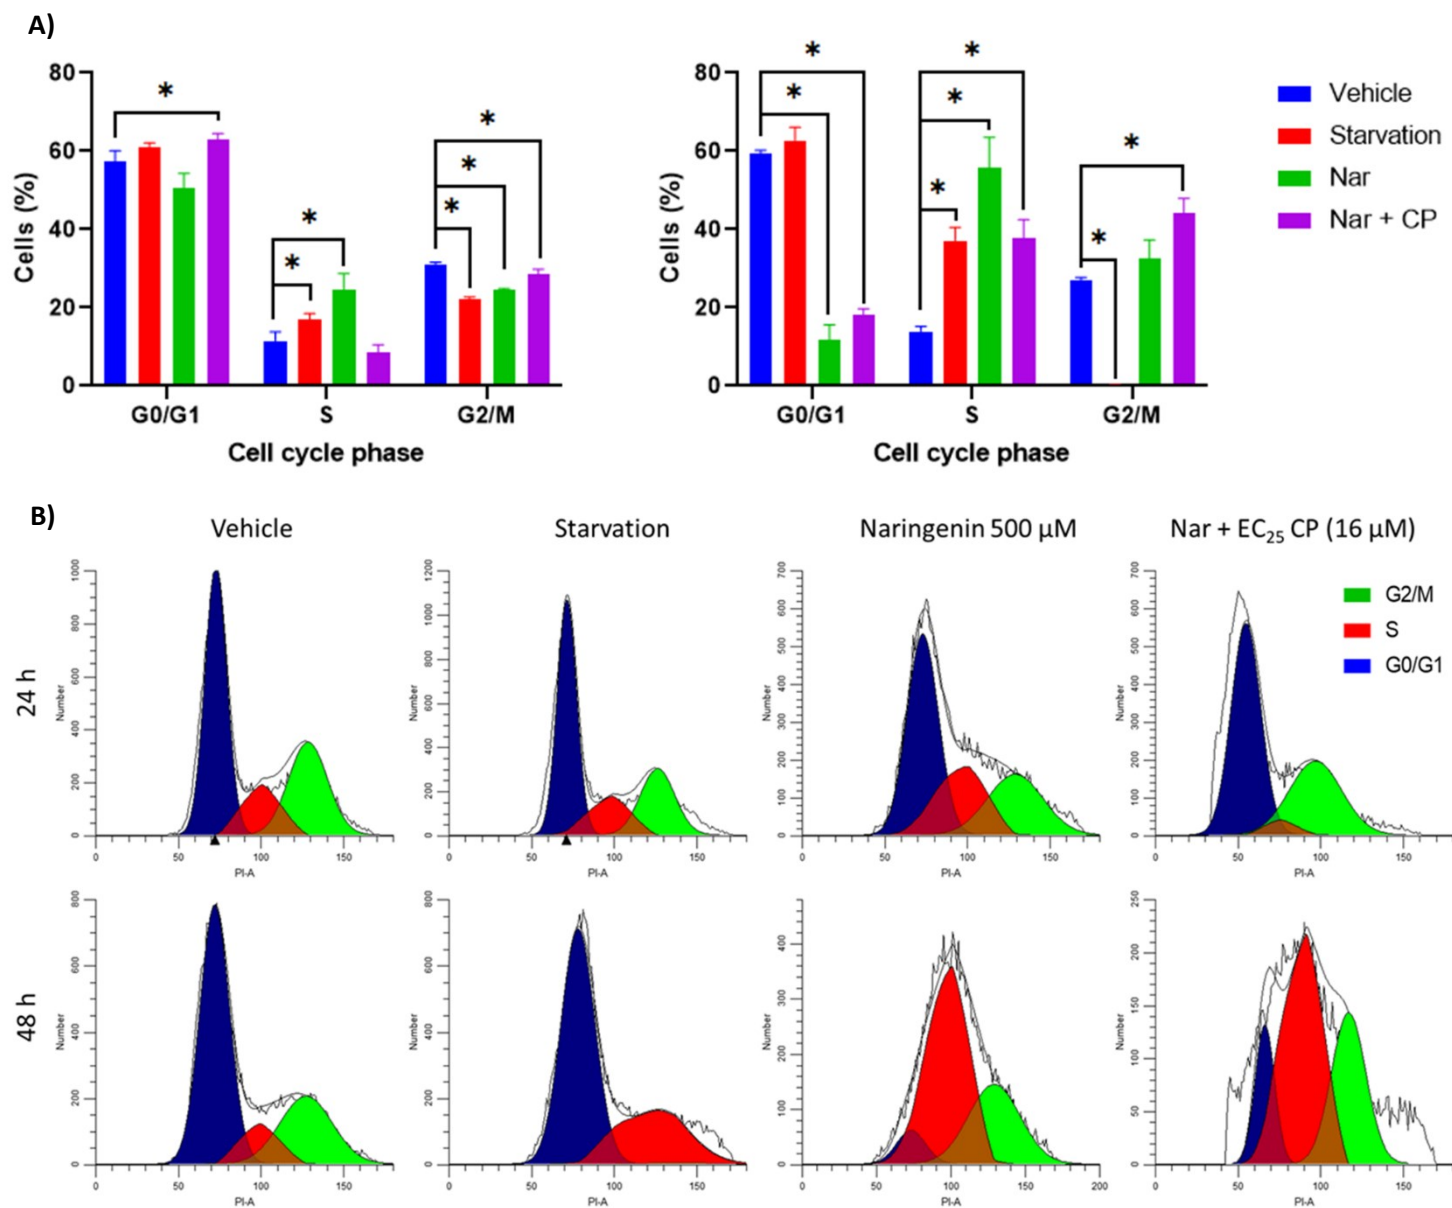

**Figure 15.** Distribution in the cell cycle of HeLa cells treated with naringenin and naringenin-EC<sub>25</sub> cisplatin (16 µM) for 24 and 48 h. A) Distribution in the different phases of the cell cycle at 24 h and 48h.  $p < 0.05$  according to Tukey's mean test,  $n=6$ ; B) Cell cycle distribution histograms at 24 h and 48h. Positive proliferation control (vehicle); Negative proliferation control (Starvation).

Relative area of invasion (um)  
of spheroids 24h

| 0      | 100    | 300   | 500   |
|--------|--------|-------|-------|
| 8.556  | 2.985  | 2.071 | 1.424 |
| 23.811 | 3.623  | 2.825 | 3.181 |
| 9.684  | 11.907 | 1.654 | 1.579 |
| 12.653 | 5.235  | 0.439 | 0.937 |
| 5.719  | 7.664  | 1.264 | 0.685 |
| 19.656 | 5.198  | 1.142 | 1.587 |
| 10.074 | 6.785  | 0.951 | 0.565 |
| 7.772  | 3.156  | 1.023 | 0.916 |
| 8.151  | 5.015  | 2.878 | 0.483 |
| 10.637 | 2.974  | 1.633 | 1.125 |
| 2.314  | 18     | 1.49  | 2.245 |
| 15.916 | 6.595  | 3.738 | 1.777 |

Relative area of invasion (um) At 48h

| 0      | 100    | 300    | 500   |
|--------|--------|--------|-------|
| 10.504 | 30.406 | 6.874  | 3.489 |
| 36.233 | 12.097 | 4.904  | 3.624 |
| 35.195 | 28.374 | 7.442  | 2.022 |
| 30.246 | 17.254 | 11.797 | 9.41  |
| 24.265 | 19.636 | 5.015  | 0.867 |
| 49.956 | 9.318  | 5.421  | 3.151 |
| 15.402 | 6.164  | 7.21   | 2.8   |
| 17.053 | 13.36  | 5.595  | 3.503 |
| 37.462 | 12.894 | 6.198  | 0.728 |
| 35.933 | 18.11  | 12.102 | 2.747 |
| 12.821 | 21.753 | 7.256  | 2.21  |

Relative area of invasion (um)  
Combination of naringenin +  
cis-platinum

| Vehicle | EC25   | EC25+Nar | EC50   | EC50+Nar |
|---------|--------|----------|--------|----------|
| 8.556   | 4.637  | 12.937   | 13.056 | 2.64     |
| 23.811  | 9.846  | 8.88     | 5.946  | 6.568    |
| 9.684   | 9.932  | 5.002    | 4.117  | 2.38     |
| 12.653  | 20.645 | 3.425    | 3.482  | 4.152    |

|        |        |       |       |        |
|--------|--------|-------|-------|--------|
| 5.719  | 13.165 | 9.438 | 9.709 | 1.393  |
| 19.656 | 11.304 | 5.114 | 1.618 | 3.465  |
| 10.074 | 19.502 | 2.218 | 9.348 | 9.742  |
| 7.772  | 14.863 | 8.973 | 3.323 | 11.284 |
| 8.151  | 20.025 | 2.543 | 4.395 | 5.71   |
| 10.637 | 23.761 | 9.488 | 4.935 | 5.003  |
| 2.314  | 14.768 | 6.802 | 5.698 | 6.372  |
